# Supplementary material
Source: MDPI journal article supplement (https://www.mdpi.com/1424-8247/14/2/111)
Supplement: s1 [file s1]

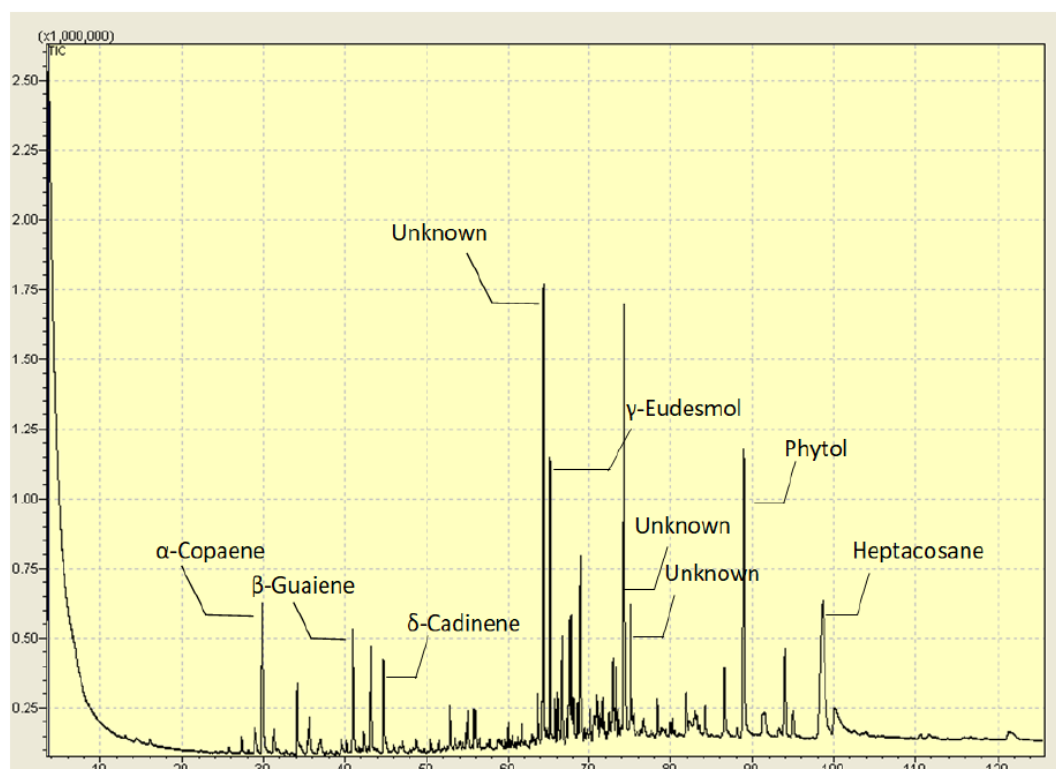

**Figure S1.** GC-MS chromatogram of the essential oil of *E. intisy*. The peaks corresponding to relevant (> 2%) and not identified (unknown) compounds are indicated.

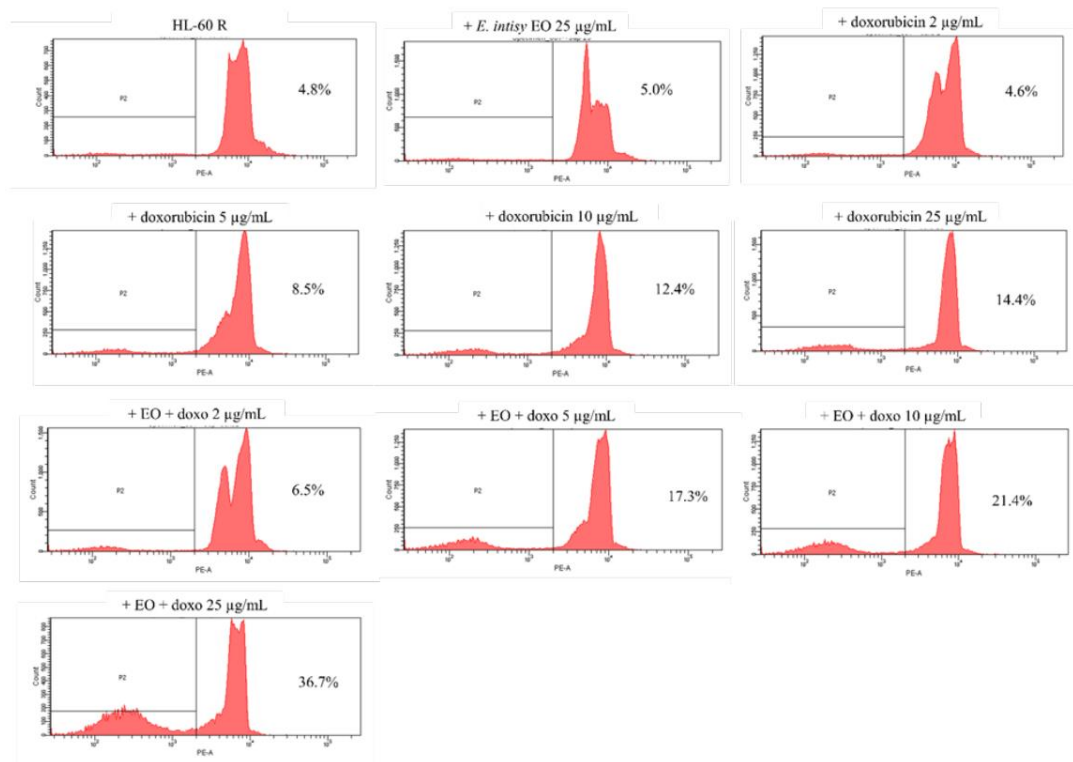

**Figure S2.** Induction of cell death by *E. intisy* essential oil and doxorubicin in HL-60R cells. Representative example of flow cytometry analysis of apoptosis in HL-60R cells treated for 48 h with 25 µg/mL of *E. intisy* essential oil and different concentrations of doxorubicin, either alone or in combination. The profiles of propidium iodide stained DNA are shown. The percentages of the events accumulated in the preG0–G1 position are indicated in each panel.
